# Supplementary material for: Assessment of milk protein digestion kinetics: effects of denaturation by heat and protein type used
Source: Royal Society of Chemistry journal article supplement (doi:10.1039/d2fo00542e), 2022-01-01
Supplement: d2fo00542e1.pdf [file d2fo00542e1.pdf]

## Supplementary material

**Supplementary table 1.** Degree of protein hydrolysis, free amino acid and peptide content of undigested milk protein solutions and after gastric digestion in SIM<sup>1</sup>.

|                      | NWPI        |             | DWPI        |              | PBI          |               |
|----------------------|-------------|-------------|-------------|--------------|--------------|---------------|
|                      | MPS         | G120        | MPS         | G120         | MPS          | G120          |
| DH (%)               | 0           | 0.22 ± 0.04 | 0           | 0.31 ± 0.07  | 0            | 0.17 ± 0.01   |
| LMW (% of $P_c(0)$ ) | 0.13 ± 0.03 | 0.24 ± 0.02 | 0.09 ± 0.03 | 0.17 ± 0.06  | 0.91 ± 0.05* | 1.01 ± 0.04*  |
| FAA (% of $P_c(0)$ ) | 0           | 0.06 ± 0.03 | 0           | 0.06 ± 0.03  | 0            | 0.13 ± 0.02   |
| MMW (% of $P_c(0)$ ) | 4.79 ± 1.07 | 6.91 ± 0.14 | 3.69 ± 0.90 | 3.40 ± 0.35  | 9.20 ± 0.47* | 13.37 ± 0.57* |
| HMW (% of $P_c(0)$ ) | 0           | 2.63 ± 0.75 | 0           | 9.05 ± 1.56# | 0            | 2.29 ± 0.28   |

<sup>1</sup>Means ± SEM, n=3. SIM = semi-dynamic *in vitro* model of the gastrointestinal tract. MPS = milk protein solution. G120 = end of gastric digestion (t=120 min). DH = degree of hydrolysis, LMW = low molecular weight peptides, FAA = free amino acids, MMW = medium molecular weight peptides, HMW= high molecular weight peptides. NWPI = native whey protein isolate, DWPI = denatured whey protein isolate, PBI = protein base ingredient. % of  $P_c(0)$  = weight percentage of crude protein amount at t=0. \* significant difference PBI vs. NWPI (P<0.05); # significant difference NWPI vs. DWPI (P<0.05).

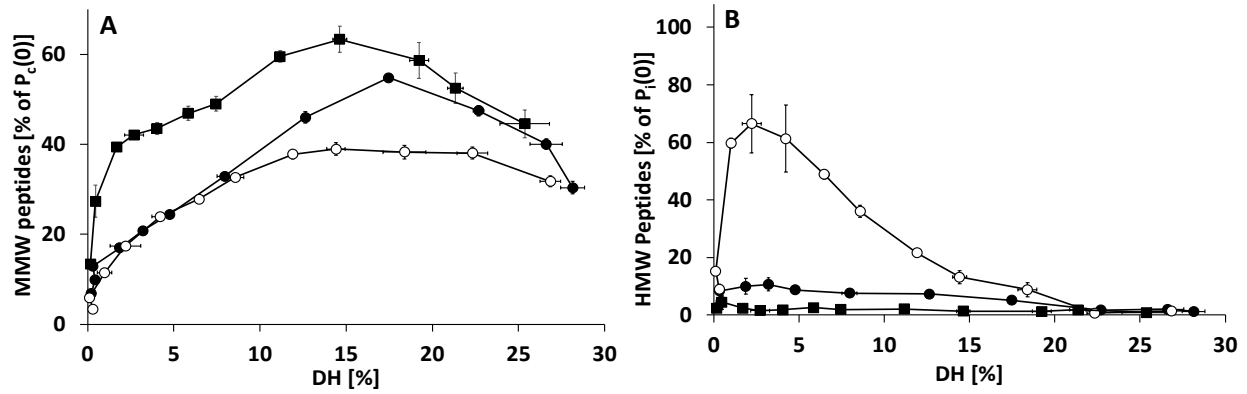

**Supplementary Figure 1.** Intermediate digestion products in the intestinal phase of SIM as function of digesta degree of hydrolysis. ○) native whey protein isolate (NWPI), ◻) denatured whey protein isolate (DWPI), ●) protein base ingredient for infant formula (PBI). A) Medium molecular weight peptides (MMW, 0.5-5 kDa) as determined by HP-SEC expressed as weight % of the crude protein (P<sub>c</sub>(0)). B) High molecular weight peptides (HMW, 5-13 kDa) expressed as % of the intact milk protein content at t=0 (P<sub>i</sub>(0)) as determined by SDS-page and densitometric analysis. Mean ± SEM (n=3).

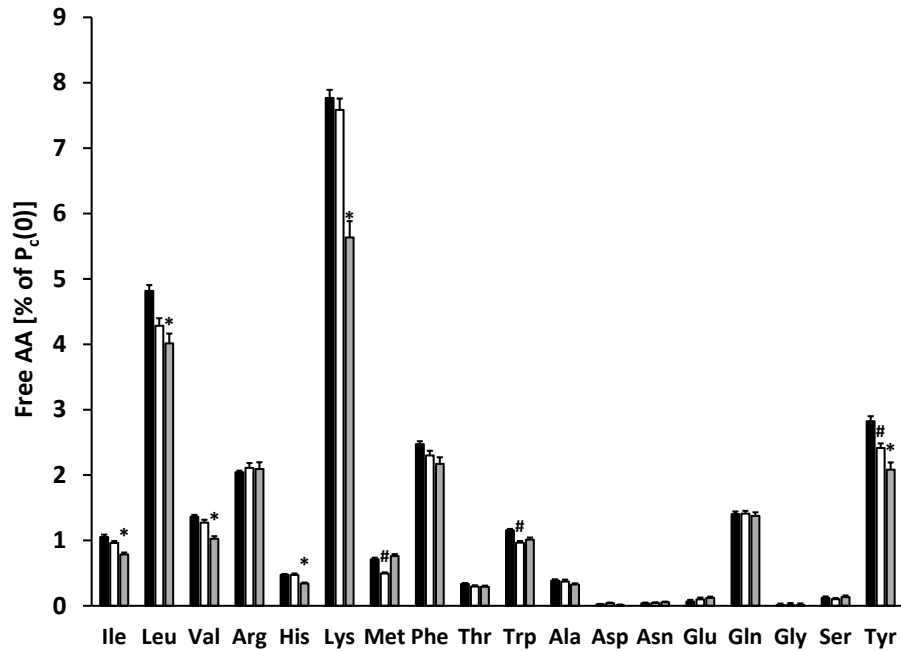

**Supplementary Figure 2.** Free individual amino acids released in SIM digestion at t180 intestinal digestion. Black bars: native whey protein isolate (NWPI), white bars: denatured whey protein isolate (DWPI), grey bars: protein base ingredient for infant formula (PBI). Means  $\pm$  SEM. # significant difference NWPI vs. DWPI ( $P < 0.05$ ). \* significant difference PBI vs. NWPI ( $P < 0.05$ ). SIM = semi-dynamic *in vitro* model of the gastrointestinal tract.

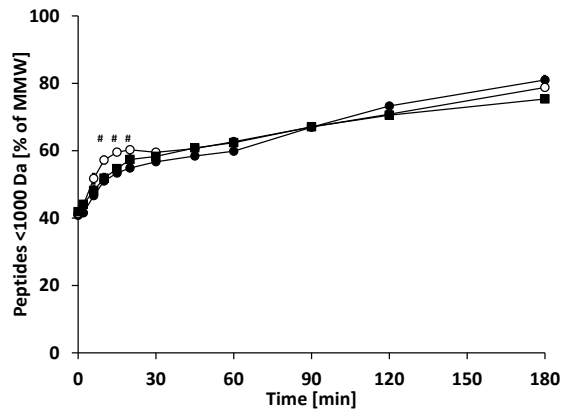

**Supplementary Figure 3.** Composition of intermediate digestion products; medium molecular weight peptides (MMW, 0.5 - 5 kDa) in SIM intestinal digesta. Weight proportion of MMW peptides <1000Da. (○) native whey protein isolate (NWPI), (◻) denatured whey protein isolate (DWPI), (●) protein base ingredient for infant formula (PBI). Mean ± SEM (n=3). # significant difference NWPI vs. DWPI (P<0.05). SIM = semi-dynamic *in vitro* model of the gastrointestinal tract.

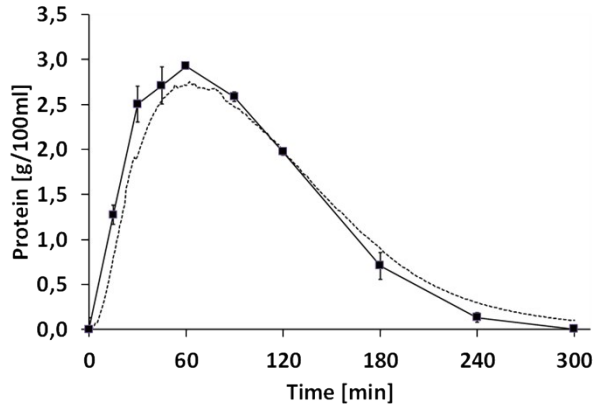

**Supplementary Figure 4.** Milk protein concentration in TIM-1 duodenum, Dotted line calculated based on mean logged actual gastric emptying curve,  $\bullet$ ) measured using dumas and corrected for blank run protein levels. Displayed are means  $\pm$  standard deviation.
